# Supplementary material for: The relations between age, face mask perceptions and face mask wearing
Source: Oxford University Press journal article supplement (doi:10.1093/pubmed/fdab018), 2021-01-22
Supplement: supplemental_material_a_fdab018.docx [file supplemental_material_a_fdab018.docx]

**Supplemental Material A – Face Mask Perceptions Scale Dimensions and Definitions**

| Dimension | Definition |
| --- | --- |
| Comfort | Perception that face masks are irritating and/or hamper breathing. |
| Efficacy Doubts | Perception that face masks do not prevent illness. |
| Access | Perception that face masks are difficult to obtain. |
| Compensation | Perception that face masks are unneeded with other safety precautions. |
| Inconvenience | Perception that face masks are inconvenient to wear. |
| Appearance | Perception that face masks have an undesirable appearance. |
| Attention | Perception that face masks attract negative social attention. |
| Independence | Perception that face masks infringe upon freedom and independence. |

Definitions for face mask perception dimensions were adapted from Howard (2020).
