# Supplementary material for: The relations between age, face mask perceptions and face mask wearing
Source: Oxford University Press journal article supplement (doi:10.1093/pubmed/fdab018), 2021-01-22
Supplement: supplemental_material_c_fdab018.docx [file supplemental_material_c_fdab018.docx]

**Supplemental Material C – Indirect Effects of Age on Face Mask Wearing via Face Mask Perceptions**

Supplemental Material C Table 1 – Mediation Analysis Results of Age, Face Mask Perceptions, and Face Mask Wearing

|  | Dataset 1 | | Dataset 3 | | |
| --- | --- | --- | --- | --- | --- |
|  | Worn Within Past Six Months | Worn Within Past Three Days | Worn Within Past Six Months | Worn Within Past Three Weeks | Worn Within Past Week |
| Direct  Effect | .00 (.00), [-.01, .01] | -.01 (.01),  [-.04, .01] | -.01 (.01), [-.03, .00] | **-.02 (.01) [-.03, -.00]** | **-.01 (.01), [-.03, -.00]** |
| Total  Indirect Effect | .00 (.00), [-.01, .01] | -.01 (.01),  [-.02, .01] | .00 (.00),  [-.01, .01] | .00 (.00),  [-.01, .01] | .00 (.00), [-.01, .01] |
| Individual Indirect Effects | | | | | |
| 1.) Comfort | .00 (.00), [-.00, .00] | .00 (.00),  [-.01, .01] | .00 (.00),  [-.00, .01] | .00 (.00), [-.00, .01] | .00 (.00), [-.00, .01] |
| 2.) Efficacy | .00 (.00),  [-.00, .00] | .00, (.00),  [-.00, .01] | .00 (.00),  [-.00, .00] | .00 (.00), [-.00, .01] | .00 (.00), [-.00, .01] |
| 3.) Accessibility | .00 (.00),  [-.00, .00] | .00 (.00),  [-.00, .00] | -.00 (.00),  [-.00, .00] | -.00 (.00),  [-.00, .00] | .00 (.00), [-.00, .00] |
| 4.) Compensation | .00 (.00),  [-.00, .01] | .00 (.00),  [-.00, .01] | .00 (.00),  [-.00, .00] | .00 (.00),  [-.00, .00] | .00 (.00), [-.00, .00] |
| 5.) Inconvenience | .00 (.00),  [-.00, .00] | -.00 (.00),  [-.01, .01] | .00 (.00),  [-.01, .00] | -.00 (.00),  [-.01, .00] | -.00 (.00), [-.01, .00] |
| 6.) Appearance | -.00 (.00),  [-.00, .00] | -.00 (.00),  [-.01, .00] | -.00 (.00),  [-.00, .00] | -.00 (.00),  [-.00, .00] | -.00 (.00), [-.00, .00] |
| 7.) Attention | -.00 (.00),  [-.01, .00] | -.01 (.00),  [-.01, .00] | -.00 (.00),  [-.00, .00] | .00 (.00),  [-.00, .00] | .00 (.00), [-.00, .00] |
| 8.) Independence | .00 (.00), [-.00, .00] | .00 (.00),  [-.00, .00] | .00 (.00),  [-.00, .00] | .00 (.00),  [-.00, .00] | .00 (.00), [-.00, .00] |

Note: The first number of each cell is the effect size; the number within parentheses is the standard error; and the numbers within brackets is the 95% confidence interval. Only the confidence intervals for the direct effect of age on face mask wearing within past two weeks and past week (Dataset 3) excluded zero. No indirect effects excluded zero in their confidence intervals.

Supplemental Material C Table 1 Continued – Mediation Analysis Results of Age, Face Mask Perceptions, and Face Mask Wearing

|  | Dataset 4 | | | | |
| --- | --- | --- | --- | --- | --- |
|  | Worn Within Past Six Months | | Worn Within Past Three Weeks | Worn Within Past Two Weeks | Worn Within Past Week | |
| Direct  Effect | .01 (.01), [-.01, .02] | | .00 (.00), [-.01, .01] | -.00 (.00), [-.01, .01] | .00 (.00), [-.01, .01] | |
| Total  Indirect Effect | **-.01 (.00), [-.02, -.00]** | | **-.01 (.00), [-.02, -.00]** | **-.01 (.00), [-.01, -.00]** | **-.01 (.00), [-.02, -.00]** | |
|  | | Individual Indirect Effects | | | |
| 1.) Comfort | .00 (.00), [-.00, .00] | | .00 (.00), [-.00, .00] | .00 (.00), [-.00, .00] | .00 (.00), [-.00, .00] | |
| 2.) Efficacy | -.00 (.00), [-.01, .00] | | -.00 (.00), [-.01, .00] | -.00 (.00), [-.01, .00] | -.00 (.00), [-.01, .00] | |
| 3.) Accessibility | -.00 (.00), [-.00, .00] | | -.00 (.00), [-.00, .00] | -.00 (.00), [-.00, .00] | -.00 (.00), [-.00, .00] | |
| 4.) Compensation | -.00 (.00) [-.00, .00] | | -.00 (.00), [-.00, .00] | -.00 (.00), [-.00, .00] | -.00 (.00), [-.00, .00] | |
| 5.) Inconvenience | -.00 (.00) [-.00, .00] | | -.00 (.00), [-.00, .00] | -.00 (.00), [-.00, .00] | -.00 (.00), [-.00, .00] | |
| 6.) Appearance | -.00 (.00) [-.01, .00] | | -.00 (.00), [-.01, .00] | -.00 (.00), [-.01, .00] | **-.00 (.00), [-.01, -.00]** | |
| 7.) Attention | -.00 (.00) [-.00, .00] | | -.00 (.00), [-.00, .00] | -.00 (.00), [-.00, .00] | -.00 (.00), [-.00, .00] | |
| 8.) Independence | -.00 (.00) [-.00, .00] | | -.00 (.00), [-.00, .00] | -.00 (.00), [-.00, .00] | -.00 (.00), [-.00, .00] | |

Note: The first number of each cell is the effect size; the number within parentheses is the standard error; and the numbers within brackets is the 95% confidence interval. Statistically significant effects are bolded.
