# Supplementary material for: The relations between age, face mask perceptions and face mask wearing
Source: Oxford University Press journal article supplement (doi:10.1093/pubmed/fdab018), 2021-01-22
Supplement: supplemental_material_d_fdab018.docx [file supplemental_material_d_fdab018.docx]

**Supplemental Material D –
Replication of Results while Controlling for Face Mask Ordinance**

Supplemental Material D provides analyses that replicate the primary findings while controlling for whether the participants’ location had a face mask ordinance at the time of their final survey. The process to conduct each analysis was identical to those provided in the primary text, but we included a dummy-coded variable that represented whether the location had a face mask ordinance as a covariate in these analyses. This variable differed based on the dataset.

In Dataset 1, participants were asked, “Does your location currently have a government order about wearing face masks?” Participants could answer, “No, and face masks are not recommended by the government”, “No, but face masks are recommended by the government”, and, “Yes, face masks are required when leaving your home.” Originally, we planned on creating two dummy-coded variables to represent the differences between these three responses, but too few participants provided the first response for analyses to be conducted. For this reason, we created one dummy-coded variable wherein the first two responses were coded as “0” and the third response was coded as “1”, which we included in all analyses using Dataset 1 below.

For all other datasets (Dataset 2, 3, and 4), we asked participants, “What state, province, department, or other defined region do you live in within your country? (e.g. California, New York, British Columbia, Siene-Saint-Denis, etc.)”. We then used the classifications of Masks4All.co (at the time of the participants’ final survey), which is a website that records whether countries and states have no, partial, or universal face mask ordinances. For most participants, we were able to record their state/province/department/etc.’s face mask ordinance, but some participants’ data had to be coded by their country. Once again, not enough locations represented the first option (no ordinances whatsoever), so we created a single dummy-coded variable with the first two options coded as “0” and the third option coded as “1” for all three datasets. We included this dummy-coded variable in each of the analyses below.

The results below replicated those presented in the primary text. All correlations, direct effects, and total indirect effects remained statistically significant or not statistically significant between the two sets of analyses. One indirect effect changed from statistically significant to not statistically significant; however, we considered the significant effect in the primary analyses to be a spurious result, and therefore this change did not alter our interpretations of our findings whatsoever. Therefore, these supplemental analyses support the robustness of our findings.

Supplemental Material D Table 1 – Correlations of Age with Face Mask Perceptions and Behaviors while Controlling for Face Mask Ordinance

|  | Dataset 1 | Dataset 2 | Dataset 3 | Dataset 4 |
| --- | --- | --- | --- | --- |
| 1.) Comfort | -.01 | -.09 | .18** | .08 |
| 2.) Efficacy | -.02 | .03 | -.04 | .10 |
| 3.) Accessibility | -.05 | -.10 | -.00 | -.00 |
| 4.) Compensation | -.09 | -.03 | .04 | -.02 |
| 5.) Inconvenience | -.02 | -.12* | .06 | .09 |
| 6.) Appearance | .01 | -.04 | .02 | .15** |
| 7.) Attention | -.14* | -.06 | -.00 | .14** |
| 8.) Independence | -.06 | .00 | .04 | .07 |
| 9.) Worn Within  Past Six Months | -.02 | - | -.09a | -.01b |
| 11.) Worn Within Past Three Weeks | - | - | -.14*a | -.07b |
| 11.) Worn Within Past Two Weeks | - | - | - | -.08b |
| 12.) Worn Within Past Week | - | - | -.11a | -.07b |
| 10.) Worn Within Past Three Days | -.05c | - | - | - |
| N | 465 | 327 | 250 | 330 |

Note: Sample sizes reported above may slightly differ from sample sizes reported in-text due to participants not providing their age. aRepresents a sample size of 207 due to face mask wearing being measured at a different timepoint.
bRepresents a sample size of 262 due to face mask wearing being measured at a different timepoint. cOnly includes responses of participants two went into public within the past three days, which resulted in a sample size of 245.

Supplemental Material D Table 2 – Mediation Analysis Results of Age, Face Mask Perceptions, and Face Mask Wearing while Controlling for Face Mask Ordinance

|  | Dataset 1 | | Dataset 3 | | |
| --- | --- | --- | --- | --- | --- |
|  | Worn Within Past Six Months | Worn Within Past Three Days | Worn Within Past Six Months | Worn Within Past Three Weeks | Worn Within Past Week |
| Direct  Effect | -.00 (.01), [-.01, .02] | -.01 (.01),  [-.04, .02] | -.01 (.01), [-.03, .00] | **-.02 (.01) [-.03, -.00]** | **-.01 (.01), [-.03, -.00]** |
| Total  Indirect Effect | .00 (.00), [-.00, .01] | -.00 (.01),  [-.02, .01] | .00 (.00),  [-.01, .01] | .00 (.00),  [-.01, .01] | .00 (.00), [-.01, .01] |
| Individual Indirect Effects | | | | | |
| 1.) Comfort | .00 (.00), [-.00, .00] | -.00 (.00),  [-.01, .01] | .00 (.00),  [-.00, .01] | .00 (.00), [-.00, .00] | .00 (.00), [-.00, .00] |
| 2.) Efficacy | .00 (.00),  [-.00, .01] | .00 (.00),  [-.00, .01] | .00 (.00),  [-.00, .00] | .00 (.00), [-.00, .01] | .00 (.00), [-.00, .01] |
| 3.) Accessibility | .00 (.00),  [-.00, .00] | .00 (.00),  [-.00, .01] | -.00 (.00),  [-.00, .00] | -.00 (.00),  [-.00, .00] | .00 (.00), [-.00, .00] |
| 4.) Compensation | .00 (.00),  [-.00, .01] | .00 (.00),  [-.00, .01] | .00 (.00),  [-.00, .00] | .00 (.00),  [-.00, .00] | .00 (.00), [-.00, .00] |
| 5.) Inconvenience | .00 (.00),  [-.00, .00] | .00 (.00),  [-.01, .01] | .00 (.00),  [-.01, .00] | -.00 (.00),  [-.01, .00] | -.00 (.00), [-.01, .00] |
| 6.) Appearance | -.00 (.00),  [-.00, .00] | -.00 (.00),  [-.01, .00] | -.00 (.00),  [-.00, .00] | -.00 (.00),  [-.00, .00] | -.00 (.00), [-.00, .00] |
| 7.) Attention | -.00 (.00),  [-.01, .00] | -.00 (.00),  [-.01, .00] | -.00 (.00),  [-.00, .00] | .00 (.00),  [-.00, .00] | .00 (.00), [-.00, .00] |
| 8.) Independence | .00 (.00), [-.00, .00] | .00 (.00),  [-.00, .00] | .00 (.00),  [-.00, .00] | .00 (.00),  [-.00, .00] | .00 (.00), [-.00, .00] |

Note: The first number of each cell is the effect size; the number within parentheses is the standard error; and the numbers within brackets is the 95% confidence interval. Only the confidence intervals for the direct effect of age on face mask wearing within past two weeks and past week (Dataset 3) excluded zero. No indirect effects excluded zero in their confidence intervals.

Supplemental Material D Table 2 – Mediation Analysis Results of Age, Face Mask Perceptions, and Face Mask Wearing while Controlling for Face Mask Ordinance

|  | Dataset 4 | | | | |
| --- | --- | --- | --- | --- | --- |
|  | Worn Within Past Six Months | | Worn Within Past Three Weeks | Worn Within Past Two Weeks | Worn Within Past Week | |
| Direct  Effect | .01 (.01), [-.01, .02] | | .00 (.00), [-.01, .01] | -.00 (.00), [-.01, .01] | .00 (.00), [-.01, .01] | |
| Total  Indirect Effect | **-.01 (.00), [-.02, -.00]** | | **-.01 (.00), [-.02, -.00]** | **-.01 (.00), [-.02, -.00]** | **-.01 (.00), [-.02, -.00]** | |
|  | | Individual Indirect Effects | | | |
| 1.) Comfort | .00 (.00), [-.00, .00] | | .00 (.00), [-.00, .00] | .00 (.00), [-.00, .00] | .00 (.00), [-.00, .00] | |
| 2.) Efficacy | -.00 (.00), [-.01, .00] | | -.00 (.00), [-.01, .00] | -.00 (.00), [-.01, .00] | -.00 (.00), [-.01, .00] | |
| 3.) Accessibility | -.00 (.00), [-.00, .00] | | -.00 (.00), [-.00, .00] | -.00 (.00), [-.00, .00] | -.00 (.00), [-.00, .00] | |
| 4.) Compensation | -.00 (.00) [-.00, .00] | | -.00 (.00), [-.00, .00] | -.00 (.00), [-.00, .00] | -.00 (.00), [-.00, .00] | |
| 5.) Inconvenience | -.00 (.00) [-.00, .00] | | -.00 (.00), [-.00, .00] | -.00 (.00), [-.00, .00] | -.00 (.00), [-.00, .00] | |
| 6.) Appearance | -.00 (.00) [-.01, .00] | | -.00 (.00), [-.01, .00] | -.00 (.00), [-.01, .00] | -.00 (.00), [-.01, .00] | |
| 7.) Attention | -.00 (.00) [-.00, .00] | | -.00 (.00), [-.00, .00] | -.00 (.00), [-.00, .00] | -.00 (.00), [-.00, .00] | |
| 8.) Independence | -.00 (.00) [-.00, .00] | | -.00 (.00), [-.00, .00] | -.00 (.00), [-.00, .00] | -.00 (.00), [-.00, .00] | |

Note: The first number of each cell is the effect size; the number within parentheses is the standard error; and the numbers within brackets is the 95% confidence interval. Statistically significant effects are bolded.
